# Supplementary material
Source: PubMed Central journal article supplement (PMC2798890)

## **Supplementary Data**

### **Materials and Methods**

#### **Cells**

Monolayer adherent HEK293T cells, HEK293T cells overexpressing Rev (Rev10<sup>+</sup> cells) and HeLa MAGI cells (TZM-bl) (1, 2) were grown in Dulbecco's modified Eagle's Medium (DMEM). The T-lymphocyte cell lines Sup-T1 and H9 were grown in RPMI 1640 medium. Cells other than the Rev10<sup>+</sup> cells were provided by the NIH Reagent Program, Division of AIDS, NIAID, NIH, Bethesda, MD, USA. Cells were incubated at 37°C in a 5% CO<sub>2</sub> atmosphere. All media were supplemented with 10% (v/v) fetal calf serum, 0.3 g/l L-glutamine, 100 U/ml penicillin and 100 U/ml streptomycin (Biological Industries, Beit Haemek, Israel). HeLaP4/shp75C115 cells (LEDGF/P75 knockdown cell line), a generous gift of Prof. Z. Debyser (Molecular Medicine, K.U. Leuven, Flanders, Belgium), were grown as described in (3). Rev10<sup>+</sup> and LEDGF/p75-knockdown Rev-expressing cells were generated by transfection into HEK293T and HeLaP4/shp75C115 cells, respectively (4) with pcDNA3.1 plasmid bearing the full Rev.

#### **Viruses**

WT HIV-1 (HXB2 (5)) and ΔEnv (6), as well as the IN mutant D64N D116N (7), were generated by transfection into HEK293T cells (4) of the virus-containing plasmid or co-transfected with a plasmid containing VSV-G (8). ΔRev pLAIY47H2 (9) and Rev M10 (10) HIVs were generated by transfection into Rev10<sup>+</sup> cells. Viruses were harvested and stored as described in (8). The pLAIY47H2 (9) viruses were a generous gift from Prof. B. Berkhout (Department of Human Retrovirology,

Academic Medical Center, University of Amsterdam, The Netherlands), and the IN mutant D64N D116N virus was a generous gift from Prof. A. Engelman (Department of Cancer Immunology and AIDS Dana-Farber Cancer Institute and Division of AIDS, Harvard Medical School, Boston, MA, USA).

### **Infection of cultured cells**

Cultured lymphocytes were infected exactly as described in (8). Briefly, Cultured lymphocytes ( $1 \times 10^5$ ) were centrifuged for 5 min at 2000 rpm and after removal of the supernatant, the cells were resuspended in 0.2 to 0.5 ml of RPMI 1640 medium containing virus at the indicated multiplicity of infection (MOI). Following absorption for 2 h at 37°C, the cells were washed to remove unbound virus and then incubated at the same temperature in RPMI 1640 medium. Cultured HEK293T cells, Rev10<sup>+</sup> cells and HeLa MAGI cells (TZM-bl) were grown for 24 h before infection, then the medium was discarded and cells were incubated at different multiplicity of infections (MOI) with the indicated virus for 2 h at 37°C. Cells were washed three times with PBS and incubated in DMEM.

### **Virus stock titration and normalization**

Quantitative titration of HIV-1 was carried out using the MAGI assay, as described by Kimpton and Emerman (2). Briefly, TZM-bl cells were grown in 96-well plates at  $1 \times 10^4$  cells per well. the cells were infected with 50 µl of serially diluted virus (wild-type, ΔRev or Rev M10 HIV-1) as described (2). Two days post-infection (PI), cultured cells were fixed and β-galactosidase was estimated exactly as described previously (2). Blue cells were counted under a light microscope at 200X magnification. In the case of IN mutant viruses (D64N D116N) the amount of viral

RNA was estimated by real time revers transcription PCR as described in (11). This was also proformed to the other HIV-1 viruses and was used to normalize the titer of the IN mutant virus.

### **Peptide synthesis and purification**

Peptides were synthesized on an Applied Biosystems (ABI) 433A peptide synthesizer and purification was performed on a Gilson HPLC using a reverse-phase C8 semi-preparative column (ACE, Advanced Chromatography Technologies, USA) as described in (8).

### **Protein expression and purification**

Expression and purification of histidine-tagged Rev-GFP conjugate was performed as previously described (12). The histidine-tagged IN and LEDGF/p75 expression vectors were a generous gift from Prof. A. Engelman and their expression and purification were performed essentially as described previously (13, 14). GST-Tat was expressed and purified as described previously (15).

### **ELISA-based binding assays**

Protein-peptide, protein-protein and protein-DNA binding was estimated using an ELISA-based binding assay exactly as described previously (16). Briefly, Maxisorp plates (Nunc) were incubated at room temperature for 2 h with 200 µl of 10 µg/ml synthetic peptide/recombinant protein in carbonate buffer (0.05 M Na<sub>2</sub>CO<sub>3</sub>/0.05 M NaHCO<sub>3</sub>, pH 9.6). After incubation, the solution was removed, the plates were washed three times with PBS, and 200 µl of 10% BSA (Sigma) in PBS (w/v) was added for 2h at room temperature. After rewashing with PBS, tested BSA- biotinilated

(Bb), peptide or protein (alone or biotinilated) or biotinilated DNA were added for further incubation for 1h at room temperature. Following three washes with PBS, the concentration of bound molecules was estimated after the addition of streptavidin-horseradish peroxidase (HRP) conjugate (Sigma), as described previously (17), or of anti-GFP mouse antibody (Santa Cruz) followed by rabbit anti-mouse IgG antibody conjugated to HRP. The enzymatic activity of HRP was estimated by monitoring the product's optical density (OD) at 490 nm using an ELISA plate reader (Tecan Sunrise Switzerland ). Each measurement was performed in duplicate. For dissociation from and binding to a complex after binding of the first protein to the Maxisorp plate, the binding partner was incubated for 1 h at room temperature and after three washes with PBS, the dissociated component was added and its binding to the complex, as well the amount of remaining bound complex, were estimated separately as described above.

### ***In-vitro* IN activity assay**

Quantitative determination of IN activity was performed exactly as described previously (18) using a previously described assay system (19, 20). Briefly, the oligonucleotide substrate consisted of one oligo (5'-ACTGCTAGAGATTTTCCCACTGACTAAAAGGGTC-3') labeled with biotin at the 3' end and the other oligo (5'-GACCCTTTTAGTCAGTGTGGAAAATCTCTAGCAGT-3') labeled with digoxigenin at the 5' end. When inhibition was studied, the IN was preincubated with the peptide or protein for 15 min prior to addition of the DNA substrate. The entire IN reaction was followed by immunosorbent assay on avidin-coated plates as described previously (18, 20).

### **Plasmid construction**

All of the plasmids used in this study were constructed using PCR cloning techniques with the highfidelity enzyme Platinum *Pfx* DNA polymerase (Invitrogen). Clones were subjected to automated DNA sequencing. For the bimolecular fluorescence complementation (BiFC) experiments, the yeast multicopy shuttle vectors pRS423 (with *HIS3* as the selective marker) and pRS426 (with *URA3* as the selective marker), both with the ADH1 promoter, were used as the cloning plasmids (a kind gift from Dr. D. Engelberg, Alexander Silberman Institute, The Hebrew University of Jerusalem). The DNA-coding region of the two yeast green fluorescent protein (GFP) fragments (21), namely the N terminus (GN) containing GFP amino acids 1–154, and the Cterminus (GC) containing GFP amino acids 155–239, were cloned into pRS423 and pRS426, respectively. A linker consisting of (GGS)<sub>5</sub> was used to separate the inserted genes. The final vectors were termed GN-linker (cloned into pRS423) and GC-linker (cloned into pRS426). The coding sequences of full-length HIV-1 IN, Rev, LEDGF/p75 and Tat were individually amplified by PCR and inserted in-frame into the corresponding sites of the GN-linker and GC-linker to allow reunion of the two GFP halves into a functional protein upon protein-protein interaction as described in (18).

### **Bimolecular fluorescence complementation (BiFC)**

The above-described plasmids were transformed into the yeast strain EGY48 (Clontech) and the cells were grown on yeast nitrogen base medium lacking histidine and uracil. After 48 h at 30 °C, the plates were transferred to 23 °C for 2 to 3 days and the appearance of fluorescence in yeast cells was visualized by confocal microscope

(MRC 1024 confocal imaging system, Bio-Rad), were as previously described (22) (18).

### **Study of *in-vivo* protein-protein interactions by co-IP**

The co-IP experiments were conducted essentially as described previously (23) with several modifications. Briefly, cells were infected with a MOI of 15 for the indicated viruses. Cells were harvested at different times post infection (PI), washed three times in PBS and lysed by the addition of PBS containing 1% (v/v) Triton X-100 for whole-cell lysate. Cytoplasmic, nuclei and PIC fractions were isolated as described below. Half of the lysate or the isolated fraction was subjected to SDS-PAGE and immunoblotted with either a monoclonal anti-Rev antibody ( $\alpha$ -Rev) (24) or antiserum raised against IN amino acids 276-288 ( $\alpha$ -IN) (NIH AIDS Research & Reference Reagent Program catalog number 758), or anti-LEDGF/p75 ( $\alpha$ -LEDGF/p75) (R&D Systems) or anti-actin ( $\alpha$ -actin) antibody (Santa Cruz), and the complementary HRP-conjugated secondary antibodies (Jackson).

The remaining lysate or isolated fractions were incubated for 1 h at 4°C with either the  $\alpha$ -Rev,  $\alpha$ -IN,  $\alpha$ -LEDGF/p75 or  $\alpha$ -actin antibodies. Following a 3-h incubation with protein G-agarose beads (Santa Cruz) at 4°C, the samples were washed three times with PBS containing 1% (v/v) Nonidet P-40. SDS buffer was added to the samples and after boiling and subjecting to SDS-PAGE, the membranes were immunoblotted with either  $\alpha$ -Rev,  $\alpha$ -IN,  $\alpha$ -LEDGF/p75 or  $\alpha$ -actin antibodies, and the complementary HRP-conjugated secondary antibodies.

When peptides were used, cells were incubated with 150  $\mu$ M of the indicated peptide for 2 h prior to infection.

Quantitative estimation of the bands was performed by Image Gauge V3.46 software (Fujifilm).

### **Isolation of cytoplasm, nuclei and PIC from infected cells**

The various fractions were obtained from virus-infected cells essentially as described previously (25) with several modifications. Briefly, cells were harvested and washed twice in buffer A (20 mM Hepes pH 7.3, 150 mM KCl, 5 mM MgCl<sub>2</sub>, 1 mM DTT and 0.1 mM PMSF). Cells were then suspended in 200 µl of buffer A with 0.025% (w/v) digitonin and incubated at room temperature for 10 min. Cells were centrifuged for 3 min at 1000g at room temperature. The supernatant was then centrifuged at 8000g and separated into supernatant (Cytoplasmic fraction) and pellet (nuclei fraction) and stored at -70°C. For PIC isolation, an equal volume of buffer B (20 mM Hepes pH 7.4, 5 mM MgCl<sub>2</sub>, 1 mM DTT and 0.1 mM PMSF) was added to the cytoplasm fraction. Samples were incubated for 10 min at room temperature and then centrifuged for 10 min at 2000g. The supernatant was discarded and the pellet, containing the PIC aggregates, was stored at -70°C.

### **Cytoplasm, nuclei and PIC fraction Analysis**

Cytoplasm and nuclei fractions were analyzed by western blot as described above. For detection of fraction specific protein anti actin antibody (Santa Cruz) and anti histone H3 antibody (abcam) were used.

For the analysis of the PIC a total viral DNA was estimated by real time PCR as described below as well as integration of the PIC fraction *in-vitro* as described at (26).

### **Quantitative analysis of copy numbers of HIV-1 DNA integrated into the cellular genome (integration events)**

The integration reaction, as well as the integration events, were performed exactly as described previously (8). Briefly, Integrated HIV-1 sequences were amplified by two PCR replication steps using the HIV-1 LTR-specific primer (LTR-TAG-F 5'-ATGCCACGTAAGCGAACTCTGGCTAACTAGGGAACCCACTG-3') and Alu-targeting primers (first-Alu-F 5'-AGCCTCCCGAGTAGCTGGGA-3' and first-Alu-R 5'-TTACAGGCATGAGCCACCG-3') (27). Alu-LTR fragments were amplified from 10 ng of total cell DNA in a 25- $\mu$ l reaction mixture containing 1X PCR buffer, 3.5 mM MgCl<sub>2</sub>, 200  $\mu$ M dNTPs, 300 nM primers, and 0.025 units/ $\mu$ l of *Taq* polymerase. The first-round PCR cycle conditions were as follows: a DNA denaturation and polymerase activation step of 10 min at 95°C and then 12 cycles of amplification (95°C for 15 s, 60°C for 30 s, 72°C for 5 min).

During the second-round PCR, the first-round PCR product could be specifically amplified by using the tag-specific primer (tag-F 5'-ATGCCACGTAAGCGAACTC-3') and the LTR primer (LTR-R 5'-AGGCAAGCTTTATTGAGGCTTAAG-3') designed by PrimerExpress (Applied Biosystems) using default settings. The second-round PCR was performed on 1/25th of the first-round PCR product in a mixture containing 300 nM of each primer, 12.5  $\mu$ l of 2X SYBR Green master mixture (Applied Biosystems) at a final volume of 25  $\mu$ l, run on an ABI PRISM 7700 (Applied Biosystems). The second-round PCR cycles began with DNA denaturation and a polymerase-activation step (95°C for 10 min), followed by 40 cycles of amplification (95°C for 15 s, 60°C for 60 s).

For generation of a standard calibration curve, the SVC21 plasmid containing the full-length HIV-1<sub>HXB2</sub> viral DNA was used as a template. In the first-round PCR, the

LTR-TAG-F and LTR-R primers were used and the second-round PCR was performed using the tag-F and LTR-R primers. The standard linear curve was in the range of 5 ng to 0.25 fg ( $R = 0.99$ ). DNA samples were assayed with quadruplets of each sample. For further experimental details see ref (18). The cell equivalents in the sample DNA were calculated based on amplification of the 18S gene by real-time PCR as described in (28).

### **Quantitation of total viral DNA**

Total viral DNA was estimated using SYBR green real-time quantitative PCR 12 h PI, exactly as described in (29). Briefly, DNA samples (1 µg of DNA) were added to 95 µl containing 1×Hot-Rescue Real Time PCR Kit-SG (Diatheva s.r.l, Fano, Italy), and 100 nM of each PBS (primer-binding site) primer: F5 (5' primer, 5'-TAGCAGTGGCGCCCGA -3') and R5 (3' primer, 5'-TCTCTCTCCTTCTAGCCTCCGC -3'). All amplification reactions were carried out using an ABI Prism 7700 Sequence Detection System (Applied Biosystems): One cycle at 95 °C for 10 min, followed by 45 cycles of 15 s at 95 °C and 35 s at 68 °C. In each PCR run, three replicates were performed.

### **Quantitative estimation of HIV-1 infection by determination of extracellular p24**

The amount of p24 protein was estimated in the cell medium using an ELISA based capture assay kit (SAIC, AIDS Vaccine Program, Frederick, MD), according to the manufacturer's instructions and as described previously (18).

### **Immunostaining**

HeLaP4/shp75Cl15 cells were grown on chamber slides (Nunc), then infected with  $\Delta$ Rev HIV-1 at a MOI of 25. Cells were fixed 16 h PI exactly as described previously (30) and immunostained essentially as described previously (30) with some modifications. Briefly, after fixation, cells were blocked with 5% IgG-free BSA (Jackson) in PBS for 60 min. For detection of HIV-1 IN and Rev and the host LEDGF/p75, the cells were incubated with 1:50 rabbit  $\alpha$ -IN (NIH AIDS Research & Reference Reagent Program catalog number 758), 1:50 rat  $\alpha$ -Rev (24) and 1:100 goat  $\alpha$ -LEDGF/p75 (R&D Systems) at room temperature for 60 min each. Cells were washed five times with PBS + 0.05% (v/v) Tween 20 between antibodies. Then the cells were incubated with the following secondary antibodies: Cy2-conjugated anti-rat, Cy3-conjugated anti-rabbit and Cy5-conjugated anti-goat (Jackson) (all diluted 1:100) at room temperature for 60 min each, with five washes with PBS + 0.05% Tween 20 between antibodies. For detection of DNA, cells were stained with DAPI according to the manufacturer's protocol. Slides were prepared with Mounting Media (Bio-Rad) and immunofluorescent cells were detected with an Olympus confocal microscope.

### **Statistic analysis**

$p < 0.05$ , calculated from at least 3 repetitions for Real time analysis  $p < 0.01$ ,  $\pm$  stand for standard deviation.

## **Results**

### ***Characterization of the domains mediating the Rev-LEDGF/p75 interaction***

We used a Rev-derived peptide library (AIDS Research and Reference Reagent Program, Division of AIDS, NIAID, NIH: HIV-1 Consensus B Rev (15-mer) Peptides - Complete Set) to determine the sequences in Rev that specifically interact with the LEDGF/p75 protein. Two peptides, bearing residues 35 to 50 and 75 to 84 of the Rev protein, were found to interact with LEDGF/p75 (Figure S1A and H). Rev 35-50 and Rev 75-84 bear the Rev arginine-rich motif (ARM) and nuclear export signal (NES), respectively (31).

In addition, two LEDGF/p75-derived peptides (LEDGF 361-370 and LEDGF 402-411), which were previously found by us to interact with IN (32), also interacted with Rev-GFP (Figure S1B and H). It may be suggested that the peptides Rev 35-50, Rev 75-84, LEDGF 361-370 and LEDGF 402-411 represent the binding domains between Rev and LEDGF/p75. Support for this view was obtained from the results depicted in Figure S1C-F, showing that both groups of peptides were able to compete for binding and promote dissociation of the Rev-LEDGF/p75 interaction. Moreover, a mutual interaction between these two groups of peptides was observed (Figure S1G and H).

### ***IN enzymatic activity of PIC isolated from HIV-1 infected cells.***

The results in Figure S2A and B show that the PIC fraction obtained from a wt infected cells bears-as expected-viral cDNA as well as an enzymatic active IN. Optimal activity was observed in PIC obtained from infected cell between 10-16h PI. Both viral cDNA and IN enzymatic activity were diminished in PIC obtained from cells after 20h PI probably due to intracellular degradation processes. On the other hand in PIC isolated from infected cells with over expressing Rev, the amount of

cDNA was the same as that observed as in wt cells but no IN enzymatic activity was detected due probably to the Rev inhibitory effect.

***Characterization of the Cytoplasm and Nuclei fraction of HIV infected cells.***

Our western blot analysis clearly has indicated that no cross contamination has been occurred between the cytoplasm and nuclei fraction obtained from viral infected cells. This is evident from the results showing the presence of histone H3 protein in the nuclei but not in the cytoplasm fraction and on the other hand the presence of actin molecules in the cytoplasm but not in the nuclei fraction (Figure S2C).

## References

1. Derdeyn CA, et al. (2000) Sensitivity of human immunodeficiency virus type 1 to the fusion inhibitor T-20 is modulated by coreceptor specificity defined by the V3 loop of gp120. *J Virol* **74**: 8358-8367.
2. Kimpton J, Emerman M. (1992) Detection of replication-competent and pseudotyped human immunodeficiency virus with a sensitive cell line on the basis of activation of an integrated beta-galactosidase gene. *J. Virol* **66**: 2232-2239.
3. Vandekerckhove L, et al. (2006) Transient and stable knockdown of the integrase cofactor LEDGF/p75 reveals its role in the replication cycle of human immunodeficiency virus. *J Virol* **80**: 1886-1896.
4. Cullen BR. (1987) Use of eukaryotic expression technology in the functional analysis of cloned genes. *Methods Enzymol* **152**: 684-704.
5. Ratner L, et al. (1985) Complete nucleotide sequence of the AIDS virus, HTLV-III. *Nature* **313**: 277-284.
6. Gummuluru S, Kinsey CM, Emerman M. (2000) An in vitro rapid-turnover assay for human immunodeficiency virus type 1 replication selects for cell-to-cell spread of virus. *J Virol* **74**: 10882-10891.
7. Nakajima N, Lu R, Engelman A. (2001) Human immunodeficiency virus type 1 replication in the absence of integrase-mediated dna recombination: definition of permissive and nonpermissive T-cell lines. *J Virol* **75**: 7944-7955.
8. Levin A, et al. (2009) Peptides derived from HIV-1 integrase that bind Rev stimulate viral genome integration. *PLoS ONE* **4**: e4155.
9. Verhoef K, Koper M, Berkhout B. (1997) Determination of the minimal amount of Tat activity required for human immunodeficiency virus type 1 replication. *Virology* **237**: 228-236.
10. Bahner I, et al. (1993) Comparison of trans-dominant inhibitory mutant human immunodeficiency virus type 1 genes expressed by retroviral vectors in human T lymphocytes. *J Virol* **67**: 3199-3207.
11. Pizzato M, et al. (2009) A one-step SYBR Green I-based product-enhanced reverse transcriptase assay for the quantitation of retroviruses in cell culture supernatants. *J Virol Methods* **156**: 1-7.
12. Fineberg K, et al. (2003) Inhibition of nuclear import mediated by the Rev-arginine rich motif by RNA molecules. *Biochemistry* **42**: 2625-2633.
13. Jenkins TM, Engelman A, Ghirlando R, Craigie R. (1996) A soluble active mutant of HIV-1 integrase: involvement of both the core and carboxyl-terminal domains in multimerization. *J Biol Chem* **271**: 7712-7718.
14. Turlure F, Maertens G, Rahman S, Cherepanov P, Engelman A. (2006) A tripartite DNA-binding element, comprised of the nuclear localization signal and two AT-hook motifs, mediates the association of LEDGF/p75 with chromatin in vivo. *Nucleic Acids Res* **34**: 1653-1675.
15. Rhim H, Echeteu CO, Herrmann CH, Rice AP. (1994) Wild-type and mutant HIV-1 and HIV-2 Tat proteins expressed in Escherichia coli as fusions with glutathione S-transferase. *J Acquir Immune Defic Syndr* **7**: 1116-1121.
16. Rosenbluh J, et al. (2006) Positively charged peptides can interact with each other, as revealed by solid phase binding assays. *Anal Biochem* **352**: 157-168.

17. Melchior F, Paschal B, Evans J, Gerace L. (1993) Inhibition of nuclear protein import by nonhydrolyzable analogues of GTP and identification of the small GTPase Ran/TC4 as an essential transport factor. *J Cell Biol* **123**: 1649-1659.
18. Rosenbluh J, et al. (2007) Interaction between HIV-1 Rev and Integrase Proteins: A BASIS FOR THE DEVELOPMENT OF ANTI-HIV PEPTIDES. *J. Biol. Chem.* **282**: 15743-15753.
19. Craigie R, Mizuuchi K, Bushman FD, Engelman A. (1991) A rapid in vitro assay for HIV DNA integration. *Nucleic Acids Res* **19**: 2729-2734.
20. Hwang Y, Rhodes D, Bushman F. (2000) Rapid microtiter assays for poxvirus topoisomerase, mammalian type IB topoisomerase and HIV-1 integrase: application to inhibitor isolation. *Nucleic Acids Res* **28**: 4884-4892.
21. Magliery TJ, et al. (2005) Detecting protein-protein interactions with a green fluorescent protein fragment reassembly trap: scope and mechanism. *J Am Chem Soc* **127**: 146-157.
22. Kass G, et al. (2006) Permeabilized mammalian cells as an experimental system for nuclear import of geminiviral karyophilic proteins and of synthetic peptides derived from their nuclear localization signal regions. *J Gen Virol* **87**: 2709-2720.
23. Iordanskiy S, et al. (2004) Heat shock protein 70 protects cells from cell cycle arrest and apoptosis induced by human immunodeficiency virus type 1 viral protein R. *J Virol* **78**: 9697-9704.
24. Kramer-Hammerle S, et al. (2005) Identification of a novel Rev-interacting cellular protein. *BMC Cell Biol* **6**: 20.
25. Zhang J, Scadden DT, Crumpacker CS. (2007) Primitive hematopoietic cells resist HIV-1 infection via p21. *J Clin Invest* **117**: 473-481.
26. Iordanskiy S, Berro R, Altieri M, Kashanchi F, Bukrinsky M. (2006) Intracytoplasmic maturation of the human immunodeficiency virus type 1 reverse transcription complexes determines their capacity to integrate into chromatin. *Retrovirology* **3**: 4.
27. Yamamoto N, et al. (2006) Analysis of human immunodeficiency virus type 1 integration by using a specific, sensitive and quantitative assay based on real-time polymerase chain reaction. *Virus Genes* **32**: 105-113.
28. Field FJ, Born E, Murthy S, Mathur SN. (2002) Polyunsaturated fatty acids decrease the expression of sterol regulatory element-binding protein-1 in CaCo-2 cells: effect on fatty acid synthesis and triacylglycerol transport. *Biochem J* **368**: 855-864.
29. Casabianca A, et al. (2007) Fast and sensitive quantitative detection of HIV DNA in whole blood leucocytes by SYBR green I real-time PCR assay. *Mol Cell Probes* **21**: 368-378.
30. Levin A, Kutznetova L, Kahana R, Rubinstein-Guini M, Stram Y. (2006) Highly effective inhibition of Akabane virus replication by siRNA genes. *Virus Res* **120**: 121-127.
31. Pollard VW, Malim MH. (1998) The HIV-1 Rev protein. *Annu Rev Microbiol* **52**: 491-532.
32. Hayouka Z, et al. (2007) Inhibiting HIV-1 integrase by shifting its oligomerization equilibrium. *Proc Natl Acad Sci U S A* **104**: 8316-8321.

**Figure S1: Identification and characterization of Rev-LEDGF/p75 interacting domains.**

(A) LEDGF/p75 protein was added, in increasing amounts, to the following plate-bound peptides: Rev 13-23 (□), Rev 35-50 (▲), Rev 53-67 (○) and Rev 75-84 (◆) and the amount of bound LEDGF/p75 was estimated. (B) Rev-GFP and GFP proteins were added to plate-bound LEDGF 361-370 (●,◆ respectively) and LEDGF 402-411 (■,▲ respectively) peptides and the amount of Rev or GFP bound proteins was estimated. (C) Increasing amounts of the following peptides: LEDGF 361-370 (●), LEDGF 402-411 (■) and INr-1 (IN 66-80) (8) (▲, control), were mixed with 100 nM LEDGF/p75 and the binding of LEDGF/p75 to plate-bound Rev-GFP was estimated. (D) Increasing amounts of the following peptides: Rev 35-50 (▲), Rev 75-84 (◆) and Rev 13-23 (18) (□, control), were mixed with 100 nM Rev-GFP and the binding of Rev-GFP to plate-bound LEDGF/p75 was estimated (E). Same as in (C) except that the peptides were added to an already plate-bound Rev(-GFP)-LEDGF/p75 complex. (F) Same as in (D) except that the peptides were added to an already plate-bound Rev(-GFP)-LEDGF/p75 complex. (G) Binding of Rev 35-50 peptide to plate-bound LEDGF 361-370 (▲) and LEDGF 402-411 (■) peptides, and binding of Rev 75-84 peptide to plate-bound LEDGF 361-370 (●) and LEDGF 402-411 (◆) peptides. (H) Apparent  $K_d$  as calculated according to the results obtained in A, B and G. All other details are described in Materials and methods.

**Figure S2: Cytoplasm, Nuclei and PIC fraction analysis**

The different cells fractions of HIV-1 infected wt and over expressing Rev cells were isolated as described in Material and Methods and Figure 3 at different times after infection. The amount of viral cDNA (A) and the viral IN enzymatic activity (B) were estimated by real time PCR as described in Material and Methods. Western blot

analysis (C) for detection of actin and histone H3 was performed as described in Materials and Methods.

Table legend

Supplementary Table 1

Quantitative estimation of the co-immunoprecipitation (co-IP) (see Figure 3) bands was performed by Image Gauge V3.46 software (Fujifilm)

Supplementary Table 1A

| Time      | Fraction  | IP with | Anti-Rev | Anti-IN | Anti-LEDGF |
|-----------|-----------|---------|----------|---------|------------|
| 6 h PI    | Nucleus   | Actin   | 0.51     | 0       | 1.06       |
|           |           | Rev     | 0.16     | 0       | 0          |
|           |           | IN      | 0.81     | 5.98    | 22.82      |
|           |           | LEDGF   | 0.69     | 5.94    | 41.93      |
|           | Cytoplasm | Actin   | 0.31     | 0       | 0          |
|           |           | Rev     | 28.37    | 5.85    | 12.96      |
|           |           | IN      | 15.66    | 30.35   | 16.02      |
|           |           | LEDGF   | 2.57     | 3.72    | 26.2       |
|           | PIC       | Actin   | 1.77     | 0       | 0          |
|           |           | Rev     | 3.89     | 0.98    | 1.27       |
|           |           | IN      | 5.22     | 32.83   | 16.15      |
|           |           | LEDGF   | 1.97     | 11.81   | 26.49      |
| 10 hrs PI | Nucleus   | Actin   | 1.63     | 0       | 0.02       |
|           |           | Rev     | 54.67    | 6.03    | 24.08      |
|           |           | IN      | 26.56    | 31.26   | 42.07      |
|           |           | LEDGF   | 27.79    | 36.53   | 49.1       |
|           | Cytoplasm | Actin   | 1.59     | 0.02    | 0.14       |
|           |           | Rev     | 56.08    | 31.13   | 14.96      |
|           |           | IN      | 57.3     | 30.42   | 16.48      |
|           |           | LEDGF   | 20.83    | 7.23    | 28.77      |
|           | PIC       | Actin   | 1.11     | 0       | 0          |
|           |           | Rev     | 34.47    | 7.09    | 17.7       |
|           |           | IN      | 29.51    | 31.77   | 15.87      |
|           |           | LEDGF   | 12.48    | 34.09   | 25.06      |
| 16 h PI   | Nucleus   | Actin   | 6.08     | 0       | 0.11       |
|           |           | Rev     | 68.14    | 37.09   | 47.01      |
|           |           | IN      | 65.88    | 32.12   | 42.87      |
|           |           | LEDGF   | 66.91    | 31.93   | 41.43      |
|           | Cytoplasm | Actin   | 6.67     | 3.25    | 5.23       |
|           |           | Rev     | 59.36    | 27.46   | 15.82      |
|           |           | IN      | 68.39    | 32.79   | 11.57      |
|           |           | LEDGF   | 23.18    | 8.81    | 12.37      |
|           | PIC       | Actin   | 8.4      | 0.06    | 0.44       |
|           |           | Rev     | 10.41    | 2.78    | 3.07       |
|           |           | IN      | 8.12     | 2.45    | 3.02       |
|           |           | LEDGF   | 8.59     | 2.51    | 2.91       |
| 20 h PI   | Nucleus   | Actin   | 6.25     | 0.24    | 0.34       |
|           |           | Rev     | 68.64    | 0.11    | 39.76      |
|           |           | IN      | 65.5     | 5.98    | 14.38      |
|           |           | LEDGF   | 64.85    | 32.42   | 41.6       |
|           | Cytoplasm | Actin   | 7.48     | 30.82   | 2.47       |
|           |           | Rev     | 65.05    | 29.68   | 10.14      |
|           |           | IN      | 63.06    | 33.18   | 4.26       |

|  |     |       |       |      |       |
|--|-----|-------|-------|------|-------|
|  |     | LEDGF | 29.89 | 3.88 | 18.72 |
|  | PIC | Actin | 7.24  | 0.06 | 1.33  |
|  |     | Rev   | 8.14  | 0    | 0     |
|  |     | IN    | 9.03  | 0    | 0     |
|  |     | LEDGF | 6.72  | 0    | 0     |

Supplementary Table 1B

| Times   | IP with: | Anti-Rev | Anti-IN | Anti-LEDGF | Anti-Actin |
|---------|----------|----------|---------|------------|------------|
| 6 h PI  | Lysate   | 81.54    | 10.82   | 56.75      | 30.4       |
|         | Actin    | 0.38     | 8       | 0.11       | 36.53      |
|         | Rev      | 81.28    | 11.13   | 58.53      | 0          |
|         | IN       | 19.62    | 11.04   | 0.07       | 0          |
|         | LEDGF    | 80.19    | 8       | 54.67      | 0          |
| 10 h PI | Lysate   | 73.66    | 10.71   | 50.14      | 30.23      |
|         | Actin    | 0.36     | 8       | 0.03       | 35.3       |
|         | Rev      | 83.29    | 11.3    | 60.31      | 0          |
|         | IN       | 21.54    | 11.26   | 0.03       | 0          |
|         | LEDGF    | 83.2     | 8       | 60.28      | 0          |
| 16 h PI | Lysate   | 78.48    | 21.74   | 56.76      | 32.83      |
|         | Actin    | 0.79     | 8       | 0          | 38.12      |
|         | Rev      | 77.82    | 20.94   | 53         | 0.09       |
|         | IN       | 36.82    | 21.39   | 0          | 0          |
|         | LEDGF    | 80.61    | 8       | 57.83      | 0          |
| 20 h PI | Lysate   | 81.65    | 22.29   | 56.97      | 32.8       |
|         | Actin    | 1.26     | 8       | 0          | 36.57      |
|         | Rev      | 80.72    | 22.22   | 59.18      | 0          |
|         | IN       | 40.87    | 22.58   | 0.02       | 0          |
|         | LEDGF    | 91.07    | 8.01    | 64.68      | 0          |

Supplementary Table 1C

| Times   | IP with: | Anti-Rev | Anti-IN | Anti-LEDGF | Anti-Actin |
|---------|----------|----------|---------|------------|------------|
| 6 h PI  | Lysate   | 0.24     | 19.2    | 53         | 44.75      |
|         | Actin    | 0.25     | 7       | 0.15       | 47.47      |
|         | Rev      | 0.25     | 7       | 0          | 0.22       |
|         | IN       | 0.25     | 20.89   | 11.08      | 0          |
|         | LEDGF    | 0.26     | 20.82   | 56.39      | 0          |
| 10 h PI | Lysate   | 0.26     | 35.17   | 52.96      | 40.66      |
|         | Actin    | 0.26     | 7       | 0          | 45.36      |
|         | Rev      | 0.26     | 7       | 0          | 0.23       |
|         | IN       | 0.26     | 40.35   | 28.13      | 0          |
|         | LEDGF    | 0.24     | 40.25   | 61.34      | 0          |
| 16 h PI | Lysate   | 0.24     | 77.95   | 57.47      | 42.78      |
|         | Actin    | 0.24     | 7       | 0          | 48.8       |
|         | Rev      | 0.25     | 7       | 0.03       | 0.95       |
|         | IN       | 0.26     | 79.73   | 57.77      | 0          |
|         | LEDGF    | 0.26     | 80.29   | 59.35      | 0          |
| 20 h PI | Lysate   | 0.25     | 80.86   | 60.75      | 43.68      |
|         | Actin    | 0.25     | 7       | 0          | 44.36      |
|         | Rev      | 0.25     | 7.02    | 0          | 0.71       |
|         | IN       | 0.26     | 81.83   | 62         | 0          |
|         | LEDGF    | 0.25     | 88.43   | 67.87      | 0          |

Supplementary Table 1D

| Times   | IP with: | Anti-Rev | Anti-IN | Anti-LEDGF | Anti-Actin |
|---------|----------|----------|---------|------------|------------|
| 6 h PI  | Lysate   | 17.82    | 10.37   | 0.24       | 23.62      |
|         | Actin    | 0.01     | 0       | 0.28       | 29.1       |
|         | Rev      | 17.59    | 11.95   | 0.27       | 0.11       |
|         | IN       | 17.2     | 11.34   | 0.28       | 0          |
|         | LEDGF    | 0        | 0       | 0.27       | 0          |
| 10 h PI | Lysate   | 58.52    | 10.28   | 0.28       | 24.82      |
|         | Actin    | 0        | 0       | 0.28       | 27.71      |
|         | Rev      | 69.27    | 12.46   | 0.27       | 0.01       |
|         | IN       | 19.55    | 12.31   | 0.28       | 0          |
|         | LEDGF    | 0        | 0       | 0.28       | 0          |
| 16 h PI | Lysate   | 64.1     | 11.44   | 0.28       | 25.78      |
|         | Actin    | 0        | 0       | 0.27       | 30.13      |
|         | Rev      | 62.33    | 11.08   | 0.28       | 0.03       |
|         | IN       | 17.18    | 11.21   | 0.28       | 0          |
|         | LEDGF    | 0.01     | 0       | 0.28       | 0          |
| 20 h PI | Lysate   | 66.58    | 11.88   | 0.28       | 27.04      |
|         | Actin    | 0        | 0       | 0.28       | 28.74      |
|         | Rev      | 66.81    | 11.72   | 0.28       | 0.01       |
|         | IN       | 19.99    | 12.23   | 0.27       | 0          |
|         | LEDGF    | 0        | 0       | 0.27       | 0          |

Supplementary Table 1E

| Times   | IP with: | Anti-Rev | Anti-IN | Anti-LEDGF | Anti-Actin |
|---------|----------|----------|---------|------------|------------|
| 6 h PI  | Lysate   | 0.37     | 10.3    | 0.46       | 30.97      |
|         | Actin    | 0.37     | 0       | 0.48       | 33.59      |
|         | Rev      | 0.37     | 0.04    | 0.48       | 0.01       |
|         | IN       | 0.38     | 11.19   | 0.49       | 0          |
|         | LEDGF    | 0.41     | 0       | 0.48       | 0          |
| 10 h PI | Lysate   | 0.38     | 10.36   | 0.46       | 29.43      |
|         | Actin    | 0.43     | 0       | 0.55       | 31.89      |
|         | Rev      | 0.43     | 0       | 0.56       | 0.18       |
|         | IN       | 0.42     | 12.14   | 0.52       | 0          |
|         | LEDGF    | 0.44     | 0       | 0.56       | 0          |
| 16 h PI | Lysate   | 0.39     | 11.42   | 0.50       | 29.54      |
|         | Actin    | 0.38     | 0       | 0.49       | 32.69      |
|         | Rev      | 0.38     | 0       | 0.48       | 2.1        |
|         | IN       | 0.37     | 10.99   | 0.49       | 0          |
|         | LEDGF    | 0.38     | 0       | 0.50       | 0          |
| 20 h PI | Lysate   | 0.38     | 12.08   | 0.56       | 30.39      |
|         | Actin    | 0.38     | 0       | 0.56       | 29.63      |
|         | Rev      | 0.40     | 0       | 0.55       | 2.9        |
|         | IN       | 0.41     | 12.21   | 0.55       | 0          |
|         | LEDGF    | 0.40     | 0       | 0.56       | 0          |

Supplementary Table 1F

| Times   | Peptide                 | IP with: | Anti-Rev | Anti-IN | Anti-LEDGF |
|---------|-------------------------|----------|----------|---------|------------|
| 6 h PI  | INr-1 & 2               | Rev      | 26.42    | 0.01    | 7.86       |
|         |                         | IN       | 0.83     | 17.02   | 19.95      |
|         |                         | LEDGF    | 0        | 17.44   | 42.58      |
|         | Rev 13-23 & 53-67       | Rev      | 18.08    | 0       | 6.48       |
|         |                         | IN       | 0        | 16.68   | 21.52      |
|         |                         | LEDGF    | 0        | 15.04   | 46.15      |
|         | Rev 35-50 & 75-84       | Rev      | 91.13    | 6.6     | 0.04       |
|         |                         | IN       | 24.39    | 39.75   | 21.74      |
|         |                         | LEDGF    | 0        | 16.12   | 52.39      |
|         | LEDGF 361-370 & 402-411 | Rev      | 92.76    | 6.73    | 0          |
|         |                         | IN       | 19.41    | 38.63   | 0.36       |
|         |                         | LEDGF    | 0.02     | 0.01    | 52.63      |
| 10 h PI | INr-1 & 2               | Rev      | 16.46    | 1.3     | 19.81      |
|         |                         | IN       | 0.02     | 41.06   | 46.03      |
|         |                         | LEDGF    | 19.65    | 36.47   | 49.39      |
|         | Rev 13-23 & 53-67       | Rev      | 23.6     | 0.02    | 20.75      |
|         |                         | IN       | 0        | 41.59   | 46.67      |
|         |                         | LEDGF    | 18.95    | 36.51   | 58.28      |
|         | Rev 35-50 & 75-84       | Rev      | 111.49   | 39.95   | 0.02       |
|         |                         | IN       | 97.09    | 41.2    | 50.18      |
|         |                         | LEDGF    | 0.01     | 40.46   | 55.05      |
|         | LEDGF 361-370 & 402-411 | Rev      | 108.23   | 41.8    | 0.05       |
|         |                         | IN       | 109.81   | 35.24   | 0.02       |
|         |                         | LEDGF    | 0        | 0       | 51.15      |
| 16 h PI | INr-1 & 2               | Rev      | 18.23    | 0       | 47.29      |
|         |                         | IN       | 0.01     | 30.04   | 12.37      |
|         |                         | LEDGF    | 85.94    | 11.41   | 50.78      |
|         | Rev 13-23 & 53-67       | Rev      | 18.75    | 0.03    | 51.58      |
|         |                         | IN       | 0.01     | 31.07   | 12.14      |
|         |                         | LEDGF    | 83.08    | 11.79   | 40.16      |
|         | Rev 35-50 & 75-84       | Rev      | 90.12    | 29.11   | 0.93       |
|         |                         | IN       | 83.24    | 35.53   | 31.41      |
|         |                         | LEDGF    | 0.01     | 10.23   | 53.27      |
|         | LEDGF 361-370 & 402-411 | Rev      | 91.76    | 32.44   | 0          |
|         |                         | IN       | 86.63    | 33.35   | 0.3        |
|         |                         | LEDGF    | 0        | 0       | 52.81      |
| 20 h PI | INr-1 & 2               | Rev      | 15.81    | 0       | 45.57      |
|         |                         | IN       | 0        | 28.8    | 12.26      |
|         |                         | LEDGF    | 86.09    | 10.08   | 50.96      |
|         | Rev 13-23 & 53-67       | Rev      | 17.18    | 0       | 56.01      |
|         |                         | IN       | 0        | 31.7    | 15.35      |
|         |                         | LEDGF    | 90.36    | 12.14   | 53.33      |
|         | Rev 35-50 & 75-84       | Rev      | 80.62    | 31.64   | 0.01       |
|         |                         | IN       | 77.85    | 34.89   | 34.09      |
|         |                         | LEDGF    | 1.09     | 11.33   | 50.3       |
|         | LEDGF 361-370 & 402-411 | Rev      | 92.01    | 32.36   | 0          |
|         |                         | IN       | 86.65    | 38.89   | 0          |
|         |                         | LEDGF    | 0        | 0.01    | 55.22      |

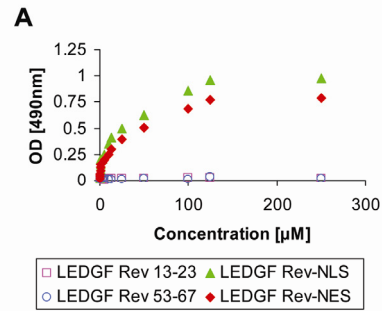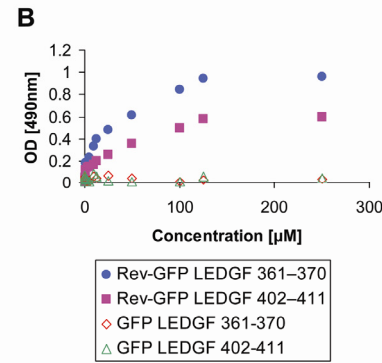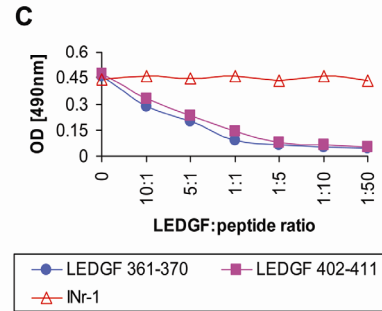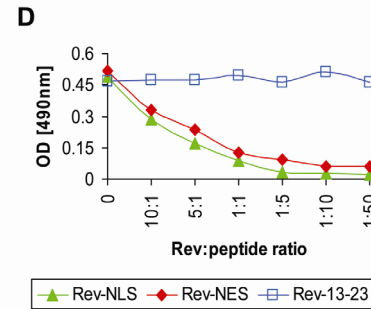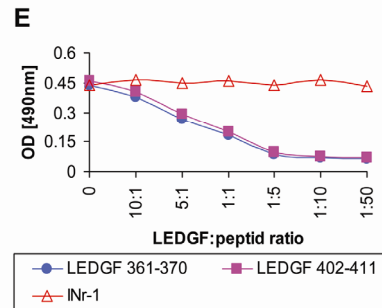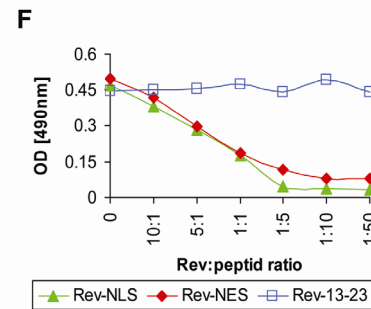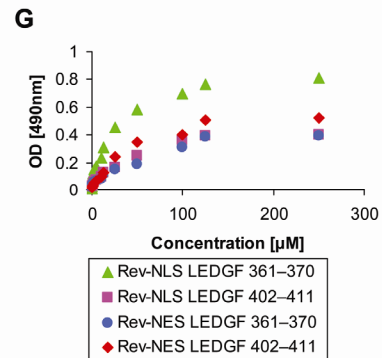

**H**

| Name          | Binding to    | Apparent $K_d$ [ $\mu\text{M}$ ] |
|---------------|---------------|----------------------------------|
| Rev 35-50     | LEDGF         | $10.2 \pm 1.8$                   |
|               | LEDGF 361-370 | $10.1 \pm 1.7$                   |
|               | LEDGF 402-411 | $17.5 \pm 1.2$                   |
| Rev 75-84     | LEDGF         | $13.6 \pm 2.4$                   |
|               | LEDGF 361-370 | $29.6 \pm 3.3$                   |
|               | LEDGF 402-411 | $16.3 \pm 3.4$                   |
| LEDGF 361-370 | Rev-GFP       | $10.3 \pm 2.7$                   |
| LEDGF 402-411 | Rev-GFP       | $18.3 \pm 1.4$                   |

**A**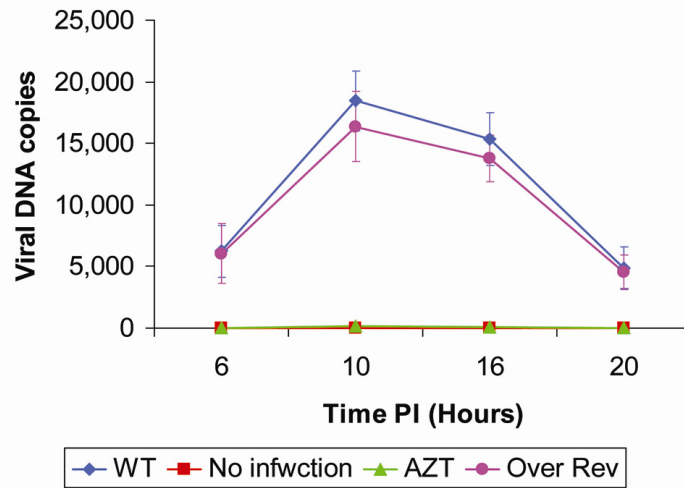**B**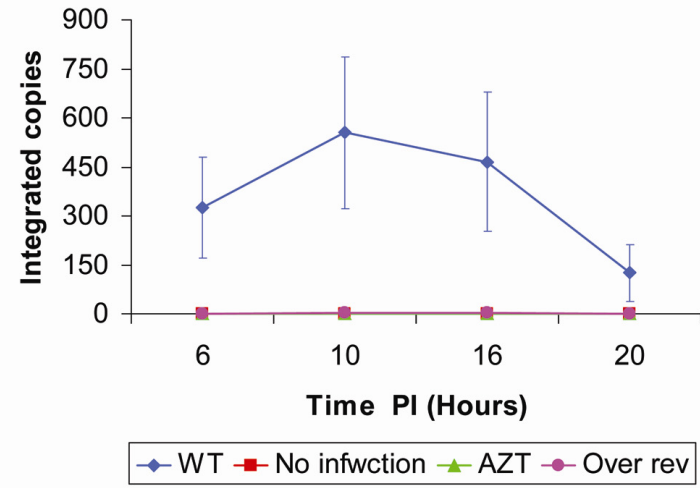**C**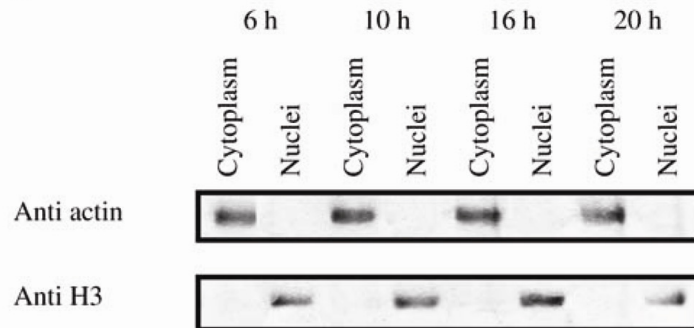

Supplement: 09_133_Levin_Suppl.pdf [file 09_133_Levin_Suppl.pdf]
